# Supplementary material for: MGP-AttTCN: An interpretable machine learning model for the prediction of sepsis
Source: PubMed Central journal article supplement (PMC8104377; doi:10.1371/journal.pone.0251248), 2021-05-07
Supplement: pone.0251248.s001.pdf [file pone.0251248.s001.pdf]

**S1 Table. Area under the ROC curve for our labels.**

| Time to onset | MGP-Log.Reg.                 | MGP-TCN        | MGP-AttTCN<br>w/o $\alpha$   | MGP-AttTCN<br>w/o $\beta$ | MGP-AttTCN<br>w/ SE kernel | MGP-AttTCN                   |
|---------------|------------------------------|----------------|------------------------------|---------------------------|----------------------------|------------------------------|
| 6h            | 65.2 $\pm$ 1.2               | 63.4 $\pm$ 1.6 | <b>66.7</b> $\pm$ <b>1.1</b> | 56.6 $\pm$ 1.1            | 66.1 $\pm$ 1.4             | 65.7 $\pm$ 1.6               |
| 5h            | 64.3 $\pm$ 1.3               | 63.5 $\pm$ 1.2 | 66.3 $\pm$ 1.4               | 54.1 $\pm$ 1.0            | 65.9 $\pm$ 1.2             | <b>66.0</b> $\pm$ <b>1.1</b> |
| 4h            | 66.1 $\pm$ 0.9               | 63.2 $\pm$ 1.3 | 66.2 $\pm$ 1.3               | 56.6 $\pm$ 1.4            | 64.2 $\pm$ 1.1             | <b>66.4</b> $\pm$ <b>1.3</b> |
| 3h            | 65.1 $\pm$ 0.8               | 64.4 $\pm$ 1.0 | 65.4 $\pm$ 0.8               | 57.0 $\pm$ 1.2            | 63.4 $\pm$ 1.0             | <b>65.7</b> $\pm$ <b>1.2</b> |
| 2h            | <b>67.0</b> $\pm$ <b>0.7</b> | 65.5 $\pm$ 1.0 | 66.4 $\pm$ 1.0               | 57.6 $\pm$ 0.9            | 63.4 $\pm$ 0.8             | 66.5 $\pm$ 1.1               |
| 1h            | <b>68.5</b> $\pm$ <b>0.6</b> | 66.7 $\pm$ 1.3 | 67.9 $\pm$ 1.0               | 59.1 $\pm$ 0.8            | 64.9 $\pm$ 0.8             | 66.6 $\pm$ 0.8               |
| 0h            | 67.5 $\pm$ 0.4               | 67.3 $\pm$ 0.9 | <b>67.7</b> $\pm$ <b>0.7</b> | 62.1 $\pm$ 0.8            | 65.5 $\pm$ 0.6             | 65.9 $\pm$ 0.6               |

**S2 Table. Area under the ROC curve for Moor et al. [21] labels.**

| Time to onset | MGP-Log.Reg.   | MGP-TCN                      | MGP-AttTCN<br>w/o $\alpha$ | MGP-AttTCN<br>w/o $\beta$ | MGP-AttTCN<br>w/ SE kernel | MGP-AttTCN                   |
|---------------|----------------|------------------------------|----------------------------|---------------------------|----------------------------|------------------------------|
| 6h            | 72.7 $\pm$ 1.4 | 73.5 $\pm$ 1.2               | 67.3 $\pm$ 1.9             | 70.1 $\pm$ 3.1            | 70.7 $\pm$ 1.4             | <b>76.7</b> $\pm$ <b>1.4</b> |
| 5h            | 73.6 $\pm$ 1.3 | 74.9 $\pm$ 0.7               | 67.6 $\pm$ 1.0             | 69.3 $\pm$ 2.2            | 70.1 $\pm$ 1.7             | <b>76.3</b> $\pm$ <b>1.0</b> |
| 4h            | 75.2 $\pm$ 1.3 | <b>74.9</b> $\pm$ <b>1.0</b> | 68.0 $\pm$ 0.9             | 72.3 $\pm$ 2.5            | 70.5 $\pm$ 0.9             | 74.6 $\pm$ 1.5               |
| 3h            | 76.8 $\pm$ 1.2 | 76.0 $\pm$ 0.6               | 69.9 $\pm$ 1.4             | 72.6 $\pm$ 1.6            | 72.1 $\pm$ 1.3             | 76.3 $\pm$ 0.9               |
| 2h            | 79.4 $\pm$ 0.6 | <b>80.2</b> $\pm$ <b>0.6</b> | 73.6 $\pm$ 1.1             | 76.3 $\pm$ 2.0            | 75.2 $\pm$ 0.8             | 78.9 $\pm$ 1.4               |
| 1h            | 82.6 $\pm$ 0.5 | <b>83.6</b> $\pm$ <b>0.4</b> | 77.3 $\pm$ 0.9             | 78.1 $\pm$ 1.6            | 80.5 $\pm$ 0.6             | 82.0 $\pm$ 0.8               |
| 0h            | 83.5 $\pm$ 0.4 | <b>87.0</b> $\pm$ <b>0.5</b> | 76.9 $\pm$ 0.7             | 79.3 $\pm$ 1.0            | 83.6 $\pm$ 0.6             | 82.3 $\pm$ 0.7               |

S3 Table. Area under the precision-recall curve for our labels.

| Time to onset | MGP-Log.Reg.                 | MGP-TCN        | MGP-AttTCN<br>w/o $\alpha$   | MGP-AttTCN<br>w/o $\beta$ | MGP-AttTCN<br>w/ SE kernel   | MGP-AttTCN     |
|---------------|------------------------------|----------------|------------------------------|---------------------------|------------------------------|----------------|
| 6h            | 47.0 $\pm$ 1.5               | 47.3 $\pm$ 1.9 | <b>50.5</b> $\pm$ <b>1.6</b> | 41.4 $\pm$ 1.1            | 49.1 $\pm$ 1.7               | 48.4 $\pm$ 1.4 |
| 5h            | 45.3 $\pm$ 1.3               | 46.0 $\pm$ 1.1 | <b>49.6</b> $\pm$ <b>1.4</b> | 38.1 $\pm$ 1.3            | 47.5 $\pm$ 1.1               | 48.3 $\pm$ 1.9 |
| 4h            | 48.5 $\pm$ 1.1               | 46.5 $\pm$ 1.6 | <b>49.4</b> $\pm$ <b>2.0</b> | 42.2 $\pm$ 1.5            | 48.3 $\pm$ 1.2               | 48.8 $\pm$ 1.4 |
| 3h            | <b>49.1</b> $\pm$ <b>1.0</b> | 47.5 $\pm$ 1.0 | 49.1 $\pm$ 1.1               | 42.4 $\pm$ 1.2            | 48.1 $\pm$ 1.1               | 48.3 $\pm$ 1.2 |
| 2h            | <b>50.8</b> $\pm$ <b>0.8</b> | 48.9 $\pm$ 1.3 | 49.2 $\pm$ 1.2               | 43.2 $\pm$ 0.8            | 50.2 $\pm$ 1.1               | 48.6 $\pm$ 0.9 |
| 1h            | <b>52.3</b> $\pm$ <b>0.8</b> | 50.1 $\pm$ 1.5 | 51.7 $\pm$ 1.2               | 44.7 $\pm$ 0.9            | 51.2 $\pm$ 0.8               | 49.0 $\pm$ 1.0 |
| 0h            | 55.8 $\pm$ 0.6               | 53.9 $\pm$ 1.2 | 55.7 $\pm$ 0.8               | 48.6 $\pm$ 1.1            | <b>57.1</b> $\pm$ <b>0.8</b> | 52.2 $\pm$ 0.7 |

S4 Table. Area under the precision-recall curve for Moor et al. [21] labels.

| Time to onset | MGP-Log.Reg.                 | MGP-TCN                      | MGP-AttTCN<br>w/o $\alpha$ | MGP-AttTCN<br>w/o $\beta$ | MGP-AttTCN<br>w/ SE kernel | MGP-AttTCN     |
|---------------|------------------------------|------------------------------|----------------------------|---------------------------|----------------------------|----------------|
| 6h            | <b>29.2</b> $\pm$ <b>2.0</b> | 20.9 $\pm$ 1.1               | 23.4 $\pm$ 1.6             | 22.8 $\pm$ 2.5            | 24.2 $\pm$ 2.4             | 24.2 $\pm$ 1.4 |
| 5h            | <b>28.3</b> $\pm$ <b>1.9</b> | 22.3 $\pm$ 1.2               | 23.9 $\pm$ 1.7             | 21.4 $\pm$ 2.2            | 27.0 $\pm$ 3.0             | 24.2 $\pm$ 1.4 |
| 4h            | <b>29.3</b> $\pm$ <b>2.0</b> | 22.9 $\pm$ 1.3               | 23.1 $\pm$ 1.4             | 22.6 $\pm$ 1.6            | 26.6 $\pm$ 1.9             | 25.5 $\pm$ 1.4 |
| 3h            | <b>29.7</b> $\pm$ <b>1.2</b> | 24.5 $\pm$ 1.0               | 24.5 $\pm$ 1.3             | 23.6 $\pm$ 1.5            | 26.5 $\pm$ 1.5             | 28.6 $\pm$ 1.7 |
| 2h            | <b>36.7</b> $\pm$ <b>1.8</b> | 31.4 $\pm$ 1.6               | 29.3 $\pm$ 1.2             | 28.1 $\pm$ 1.8            | 33.2 $\pm$ 1.4             | 31.5 $\pm$ 2.3 |
| 1h            | <b>40.5</b> $\pm$ <b>0.9</b> | 36.8 $\pm$ 1.0               | 32.5 $\pm$ 1.4             | 31.6 $\pm$ 1.9            | 38.2 $\pm$ 1.4             | 39.4 $\pm$ 1.6 |
| 0h            | 44.4 $\pm$ 1.3               | <b>47.0</b> $\pm$ <b>1.3</b> | 33.8 $\pm$ 1.0             | 36.8 $\pm$ 1.1            | 41.0 $\pm$ 1.1             | 43.1 $\pm$ 1.6 |

**S5 Table. Area under the ROC curve for our labels and the baseline dataset.**

| Time to onset | Log. Reg. | InSight | MGP-AttTCN          |
|---------------|-----------|---------|---------------------|
| 6h            | 57.2      | 54.7    | <b>64.05 ± 2.2</b>  |
| 5h            | 56.6      | 49.0    | <b>66.36 ± 1.95</b> |
| 4h            | 53.8      | 55.9    | <b>67.46 ± 1.59</b> |
| 3h            | 53.2      | 53.1    | <b>66.52 ± 1.65</b> |
| 2h            | 53.8      | 55.2    | <b>66.99 ± 1.62</b> |
| 1h            | 54.3      | 57.3    | <b>66.39 ± 1.28</b> |
| 0h            | 50.8      | 55.9    | <b>64.66 ± 1.82</b> |

**S6 Table. Area under the ROC curve for Moor et al. [21] labels and the baseline dataset.**

| Time to onset | Log. Reg.   | InSight | MGP-AttTCN          |
|---------------|-------------|---------|---------------------|
| 6h            | <b>73.9</b> | 64.5    | 72.58 ± 1.82        |
| 5h            | <b>73.9</b> | 64.4    | 72.5 ± 1.59         |
| 4h            | <b>76.2</b> | 65.7    | 71.78 ± 1.42        |
| 3h            | <b>76.5</b> | 74.1    | 73.36 ± 1.19        |
| 2h            | <b>76.2</b> | 69.7    | 75.39 ± 1.55        |
| 1h            | 77.0        | 74.1    | <b>77.71 ± 1.33</b> |
| 0h            | 77.3        | 73.1    | <b>78.56 ± 1.28</b> |

**S7 Table. Area under the Precision-Recall curve for our labels and the baseline dataset.**

| Time to onset | Log. Reg. | InSight | MGP-AttTCN          |
|---------------|-----------|---------|---------------------|
| 6h            | 37.7      | 41.4    | <b>41.68 ± 2.27</b> |
| 5h            | 37.6      | 35.9    | <b>43.29 ± 2.5</b>  |
| 4h            | 37.9      | 45.2    | <b>47.7 ± 2.22</b>  |
| 3h            | 36.2      | 38.2    | <b>45.81 ± 2.44</b> |
| 2h            | 39.9      | 38.8    | <b>46.09 ± 1.71</b> |
| 1h            | 42.2      | 41.8    | <b>47.81 ± 1.75</b> |
| 0h            | 40.7      | 46.3    | <b>49.31 ± 1.78</b> |

**S8 Table. Area under the Precision-Recall curve for Moor et al. [21] labels and the baseline dataset.**

| Time to onset | Log. Reg.   | InSight | MGP-AttTCN          |
|---------------|-------------|---------|---------------------|
| 6h            | <b>44.5</b> | 37.2    | 35.52 ± 2.05        |
| 5h            | <b>44.3</b> | 37.2    | 38.43 ± 2.51        |
| 4h            | <b>50.9</b> | 40.9    | 38.54 ± 1.51        |
| 3h            | <b>55.2</b> | 52.2    | 42.07 ± 1.22        |
| 2h            | <b>53.7</b> | 48.4    | 47.08 ± 1.86        |
| 1h            | <b>55.8</b> | 52.2    | 53.09 ± 1.19        |
| 0h            | 55.7        | 53.9    | <b>57.87 ± 1.86</b> |

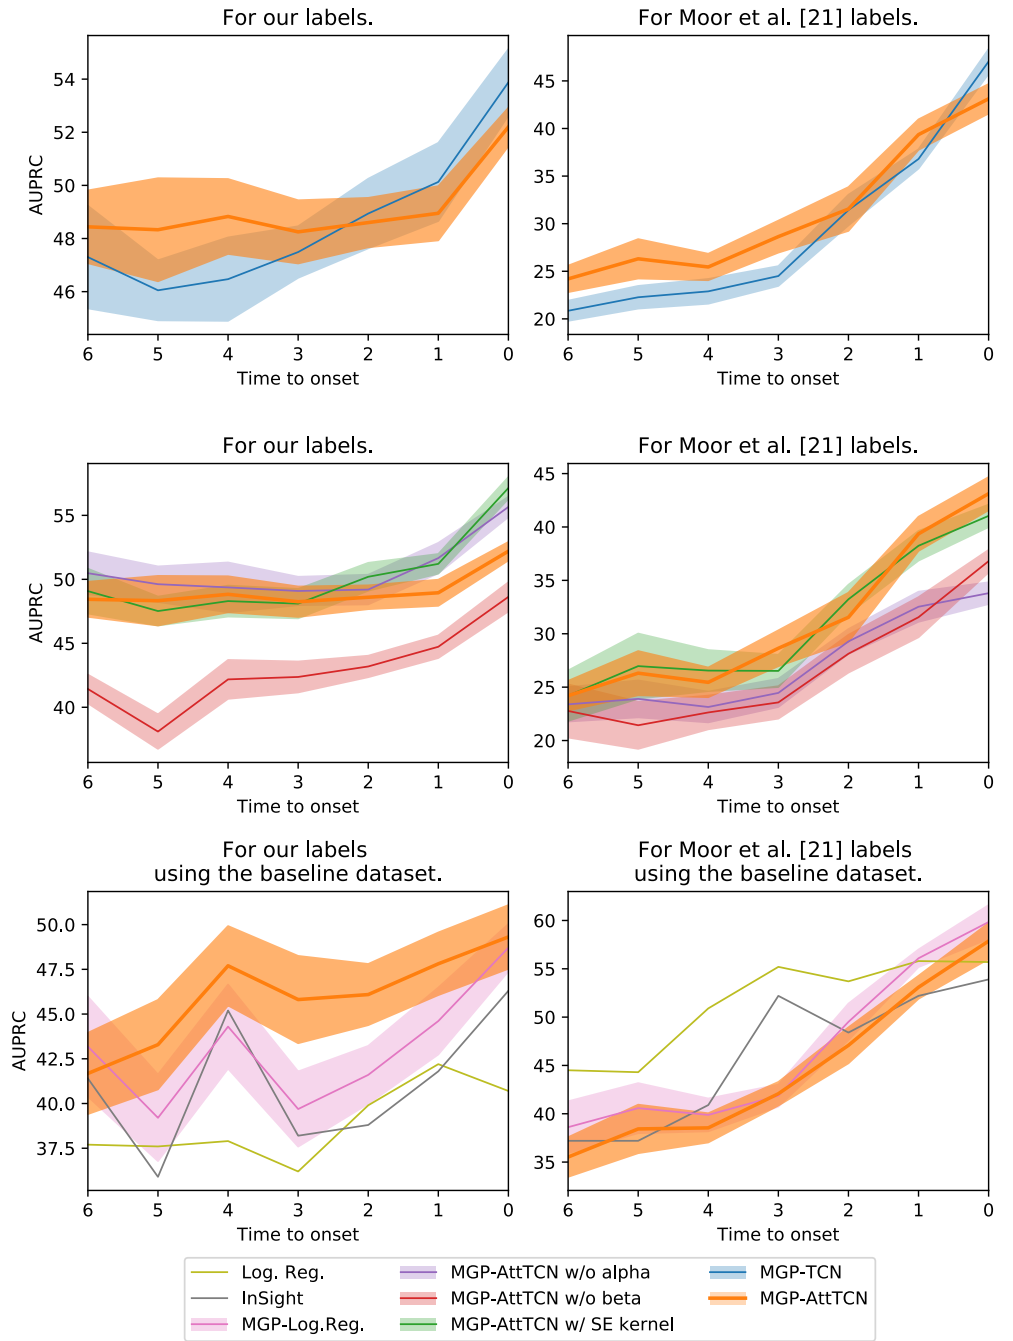

S1 Fig. Area under the Precision-Recall curve of different models.
